# Supplementary material
Source: PubMed Central journal article supplement (PMC6565365)
Supplement: NIHMS1511273-supplement-Supplementary_Table1.pdf [file NIHMS1511273-supplement-Supplementary_Table1.pdf]

Table S1: Differential Gene Expression in overlapping macrophage clusters (Control vs MI)

| C1-CON vs C1-MI | C2-CON vs C2-MI | C3-CON vs C3-MI | C4-CON vs C4-MI |
|-----------------|-----------------|-----------------|-----------------|
| Retnla          | Retnla          | Retnla          | Retnla          |
| Gm10116         | Lyve1           | Folr2           | Mgl2            |
| Rpl10-ps3       | Ccl24           | Cd36            | mt-Atp8         |
| Gm10076         | Folr2           | Cbr2            | Cd36            |
| Ccl24           | Cd36            | F13a1           | ***             |
| mt-Atp8         | mt-Atp8         | mt-Atp8         | Ssbp4           |
| Mgl2            | Mgl2            | Mgl2            | Folr2           |
| Gm2000          | Gm10020         | Ccl24           | Hspa1a          |
| Cd36            | mt-Nd4l         | Klf2            | Hspa1b          |
| Gm8186          | Gm10116         | Lyve1           |                 |
| H2-Aa           | Fxyd2           | Gm10116         |                 |
| H2-Eb1          | Ltc4s           | mt-Nd4l         |                 |
| ***             | Fcna            | mt-Nd3          |                 |
| Fcrls           | mt-Nd5          | Hspa1b          |                 |
| Ctsl            | Gm10076         | Gm10076         |                 |
| Ctsd            | S100a6          | Pf4             |                 |
| Mpeg1           | Mrps6           | mt-Nd5          |                 |
| AF251705        | Rpl10-ps3       | Gm10020         |                 |
| Ms4a7           | Cbr2            | Cfh             |                 |
| AY036118        | Klf2            | Fxyd2           |                 |
| Ccl8            | Timd4           | Fcgrt           |                 |
| Trem2           | F13a1           | Pmp22           |                 |
| Spp1            | Cfp             | Lyz1            |                 |
| C4b             | Cd163           | Rpl10-ps3       |                 |
| Clec4n          | Gm2000          | Gm8186          |                 |
|                 | Dok2            | Hspa1a          |                 |
|                 | mt-Nd3          | Chka            |                 |
|                 | Gm8186          | Nme2            |                 |
|                 | Gclm            | mt-Nd2          |                 |
|                 | S100a10         | Rhoc            |                 |
|                 | Rpl36-ps3       | Mrps6           |                 |
|                 | Cfh             | Timp2           |                 |
|                 | Hspa1b          | Ifi27l2a        |                 |
|                 | Gm11808         | Lilra5          |                 |
|                 | Pfn1            | ***             |                 |
|                 | Tubb6           | Ctsd            |                 |
|                 | Gm10073         | AY036118        |                 |
|                 | ***             | Trem2           |                 |
|                 | Fcrls           | Ms4a7           |                 |
|                 | AF251705        | Spp1            |                 |
|                 | Olfml3          |                 |                 |
|                 | Cd9             |                 |                 |
|                 | Lpcat2          |                 |                 |
|                 | AY036118        |                 |                 |
|                 | Cd72            |                 |                 |
|                 | Trem2           |                 |                 |
|                 | Clec4n          |                 |                 |
|                 | Ms4a7           |                 |                 |
|                 | Spp1            |                 |                 |

\* **Red** genes are up-regulated and **blue** genes are down-regulated

\*\*\* Transition from upregulated to downregulate genes
